# Supplementary material for: Intrathecal drug delivery systems for the management of chronic non-cancer pain: protocol for a systematic review of economic evaluations
Source: PubMed Central journal article supplement — BMJ Open. 2016 Jul 15;6(7):e012285. doi: 10.1136/bmjopen-2016-012285 (PMC4964247; doi:10.1136/bmjopen-2016-012285), 2016-07-15
Supplement: bmjopen-2016-012285supp2.pdf [file bmjopen-2016-012285supp2.pdf]

## **Additional File**

Ovid MEDLINE(R) In-Process & Other Non-Indexed Citations and Ovid MEDLINE(R)

Search strategy:

- 1 pain.mp. or exp Pain/
- 2 ((Chronic or intractable or refractory or persistent) adj3 pain\$).mp.
- 3 or/1-2
- 4 infusion pumps.mp. or exp Infusion Pumps/
- 5 drug delivery systems.mp. or exp Drug Delivery Systems/
- 6 (intrathecal adj3 administration).mp.
- 7 it administration.mp.
- 8 intrathecal.mp.
- 9 or/4-8
- 10 health care costs.mp. or exp Health Care Costs/
- 11 direct service costs.mp. or exp Direct Service Costs/
- 12 drug costs.mp. or exp Drug Costs/
- 13 employer health costs.mp. or exp Employer Health Costs/
- 14 hospital costs.mp. or exp Hospital Costs/
- 15 health expenditures.mp. or exp Health Expenditures/
- 16 capital expenditures.mp. or exp Capital Expenditures/
- 17 health economics.mp.
- 18 economic evaluation\$.mp.
- 19 economic analy\$.mp.
- 20 costs.mp. or exp "Costs and Cost Analysis"/
- 21 cost-benefit analysis.mp. or exp Cost-Benefit Analysis/
- 22 cost effective\$.mp.
- 23 cost benefit\$.mp.
- 24 cost utility\$.mp.
- 25 cost consequence.mp.

- 26 value of life.mp. or exp "Value of Life"/
- 27 economics, hospital.mp. or exp Economics, Hospital/
- 28 economics, medical.mp. or exp Economics, Medical/
- 29 economics, nursing.mp. or exp Economics, Nursing/
- 30 economics, pharmaceutical.mp. or exp Economics, Pharmaceutical/
- 31 exp "Fees and Charges"/ or fees charges.mp.
- 32 (fees and charges).mp.
- 33 budgets.mp. or exp Budgets/
- 34 (cost or costs or costed or costly or costing\$).mp.
- 35 (economic\$ or pharmacoeconomic\$ or price\$ or pricing\$).mp.
- 36 quality-adjusted life years.mp. or exp Quality-Adjusted Life Years/
- 37 (qaly or qaly\$).af.
- 38 or/10–37
- 39 3 and 9 and 38
